# Supplementary material for: Amigo2-upregulation in Tumour Cells Facilitates Their Attachment to Liver Endothelial Cells Resulting in Liver Metastases
Source: PubMed Central journal article supplement (PMC5341090; doi:10.1038/srep43567), 2017-03-08
Supplement: srep43567-s1.pdf [file srep43567-s1.pdf]

Supplementary Information

***Amigo2*-upregulation in Tumour Cells Facilitates  
Their Attachment to Liver Endothelial Cells Resulting  
in Liver Metastases**

Yusuke Kanda<sup>1</sup>, Mitsuhiro Osaki<sup>1,2</sup>, Kunishige Onuma<sup>1</sup>, Ayana Sonoda<sup>1</sup>,  
Masanobu Kobayashi<sup>3</sup>, Junichi Hamada<sup>3</sup>, Garth L. Nicolson<sup>4</sup>, Takahiro  
Ochiya<sup>5</sup> and Futoshi Okada<sup>1,2,\*</sup>

<sup>1</sup>Division of Pathological Biochemistry, Tottori University Faculty of  
Medicine, Yonago, Japan

<sup>2</sup>Chromosome Engineering Research Center, Tottori University, Yonago,  
Japan

<sup>3</sup>Health Sciences University of Hokkaido, School of Nursing and Social  
Services, Ishikari-Tobetsu, Japan

<sup>4</sup>Department of Molecular Pathology, The Institute for Molecular  
Medicine, South Laguna Beach, CA, USA

<sup>5</sup>Division of Molecular and Cellular Medicine, National Cancer Center  
Research Institute, National Cancer Center Hospital, Tsukiji, Chuo-ku,  
Tokyo, Japan

\*Address correspondence and reprint requests to:

Futoshi Okada, Ph.D.

Division of Pathological Biochemistry, Tottori University Faculty of  
Medicine, 86 Nishicho, Yonago 683-8503, Japan

Phone: +81-859-38-6241; Fax: +81-859-38-6240;

E-mail: fuokada@med.tottori-u.ac.jp

Supplementary Figure S1.

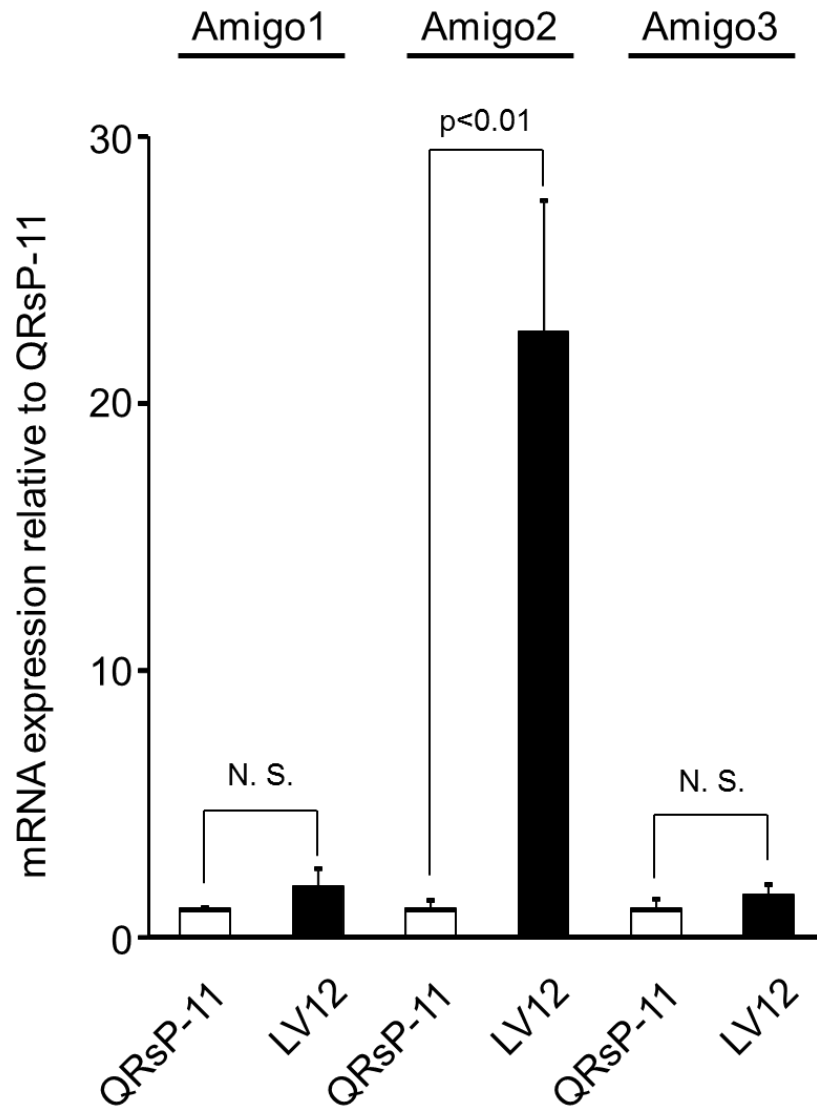

***Assessment of Amigo family mRNA expression in LV12 and QRsP-11 cells***

The mRNA expression levels of *Amigo1*, *Amigo2* and *Amigo3* in LV12 and QRsP-11 cells were evaluated using qRT-PCR. Bar graphs show means  $\pm$  SD (n = 4 in each group)

**Supplementary Figure S2.**

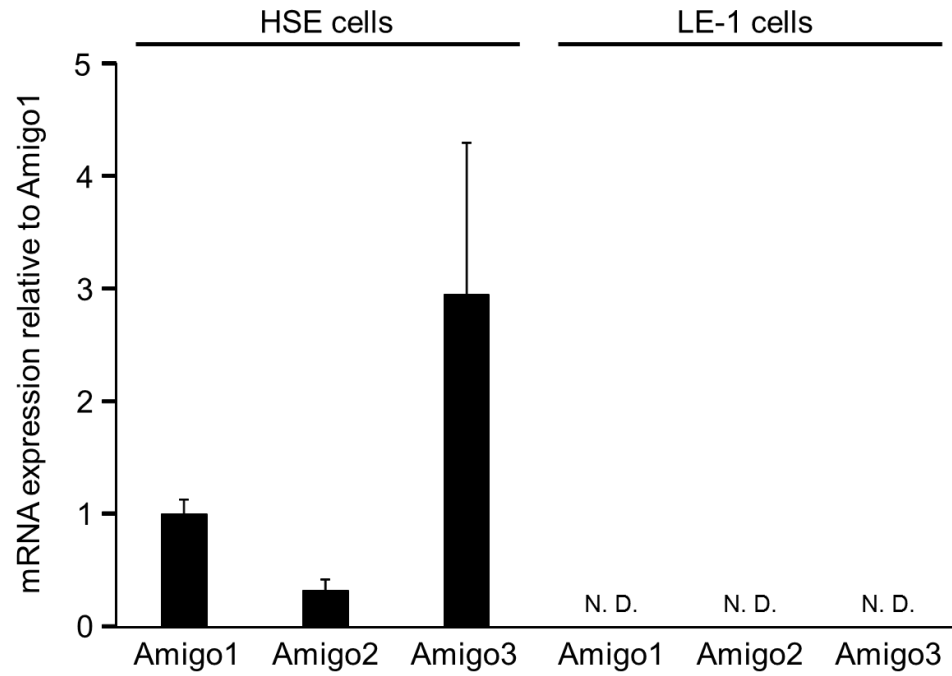

***mRNA expression profiles of Amigo family members in HSE and LE-1 cells***

Levels of *Amigo1*, *Amigo2* and *Amigo3* mRNAs in HSE and LE-1 cells were measured using qRT-PCR. Bar graphs show means  $\pm$  SD (n = 4 in each group).

Supplementary Figure S3.

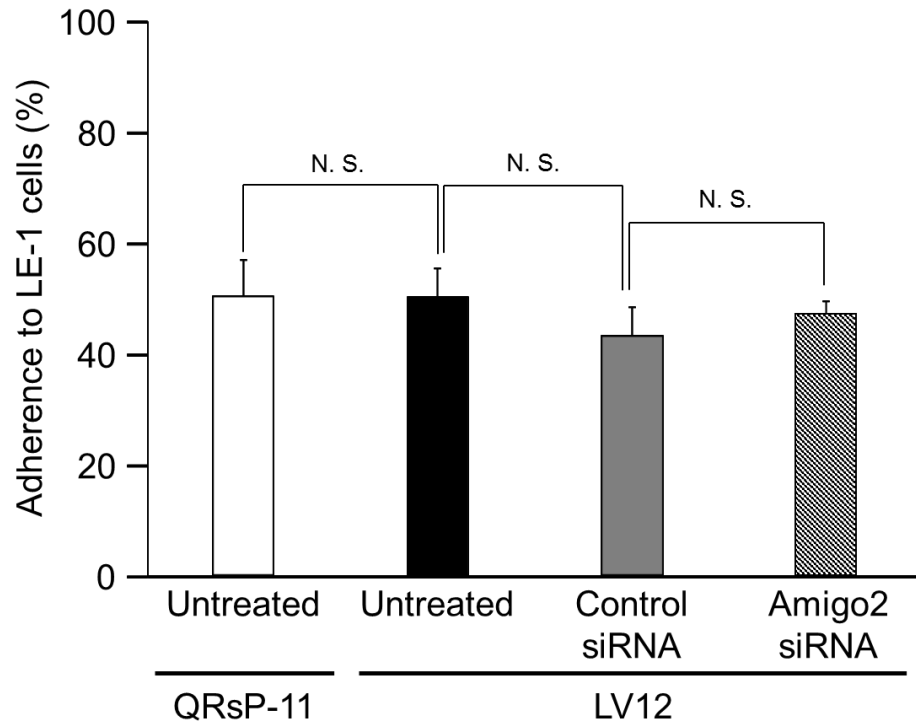

***Amigo2 was not required for LV12 cell adhesion to LE-1 lung endothelial cells***

LV12 cells were transfected with *Amigo2* or control siRNA and their adhesion to LE-1 lung endothelial cells was then assayed. Bar graphs show means  $\pm$  SD (n = 5 in each group).

**Supplementary Figure S4.**

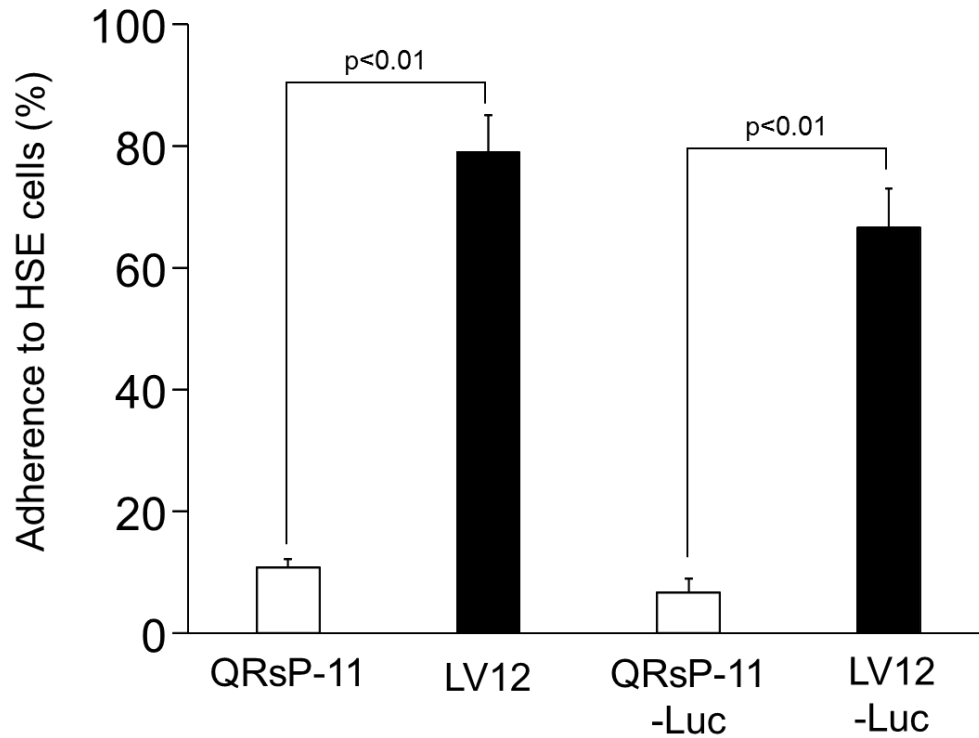

***Adhesion properties of tumour cells to HSE liver endothelial cells were not changed by introduction of a luciferase expression vector***

The adhesion properties of LV12-Luc or QRsP-11-Luc cells to HSE liver endothelial cells were assessed using an *in vitro* adhesion assay. Bar graphs show means  $\pm$  SD (n = 10 in each group).

Supplementary Figure S5.

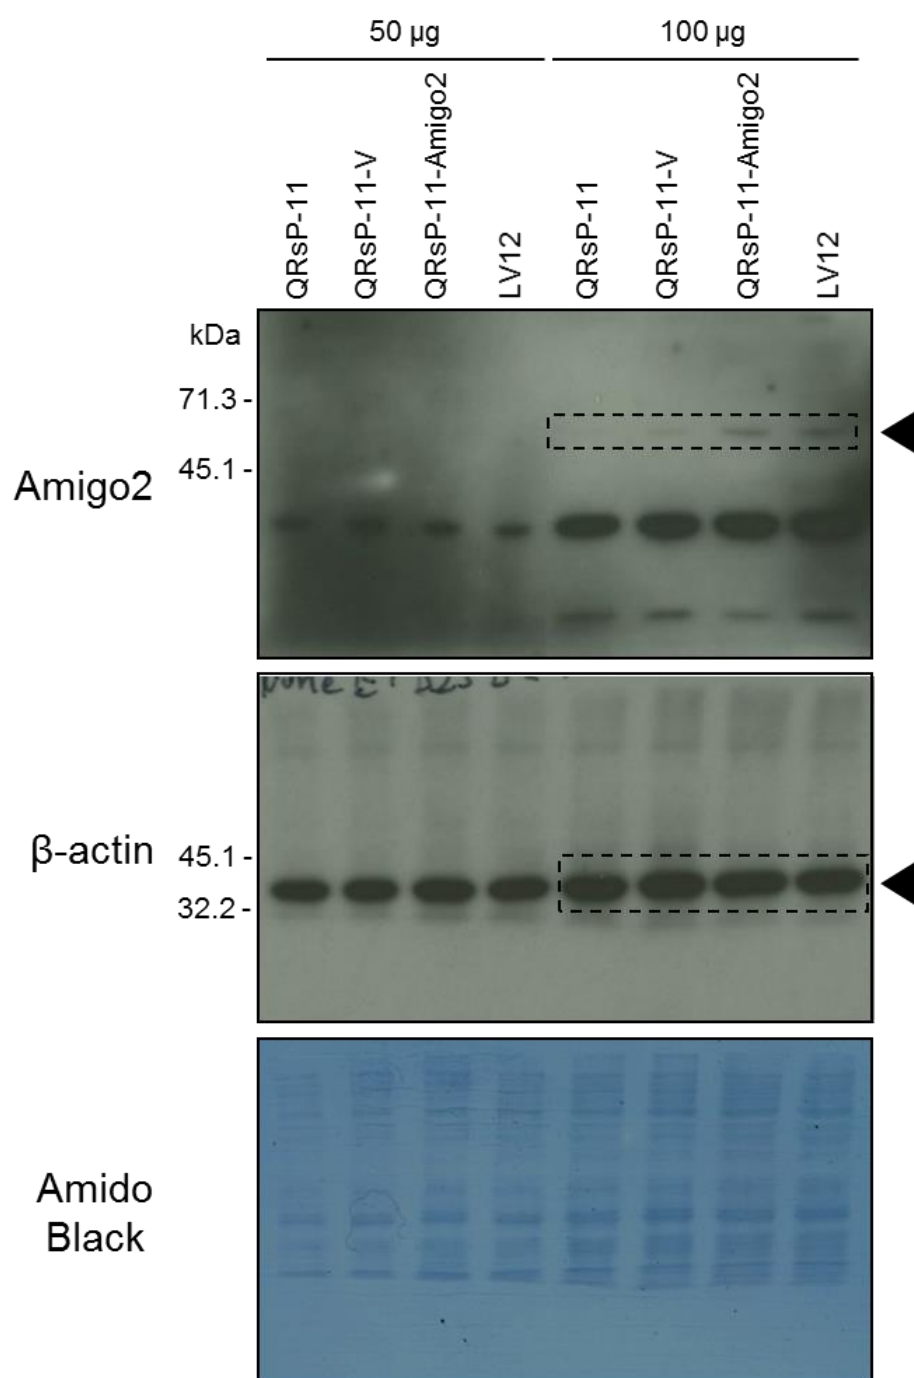

*Whole western blots from Figure 5a in the manuscript*

The top panel is the whole gel image for western blot using anti-Amigo2 antibody in Figure 5a. The middle panel is the whole gel image for western blot using anti- $\beta$ -

actin antibody in Figure 5a. The bottom panel is 0.1% Amido Black 10B (015-02192, Wako, Osaka, Japan) staining for confirmation of equivalence of the loading protein in each lane. The mouse monoclonal anti-Amigo2 antibody is described in the manufacturer's website ([https://www.scbt.com/scbt/product/amigo2-antibody-g-7?productCanUrl=amigo2-antibody-g-7&\\_requestid=916644](https://www.scbt.com/scbt/product/amigo2-antibody-g-7?productCanUrl=amigo2-antibody-g-7&_requestid=916644)) and datasheet (<https://datasheets.scbt.com/sc-373699.pdf>).

**Supplementary Table S1.**

***Changes in mean survival in days, liver-to-body weight ratios and Amigo2 expression following in vivo selection of a subline with high liver-metastatic properties***

| Cell line <sup>a</sup> | No. of mice examined | Mean survival in days   | Liver-to-body weight ratios (%) | Relative Amigo2 mRNA expression <sup>b</sup> |
|------------------------|----------------------|-------------------------|---------------------------------|----------------------------------------------|
| QRsP-11                | 5                    | 17.0 ± 4.0              | 8.4 ± 4.8                       | 1.0 ± 0.2                                    |
| LV1                    | 5                    | 18.4 ± 3.4              | 6.5 ± 3.4                       | 3.0 ± 0.4 <sup>d</sup>                       |
| LV2                    | 3                    | 16.0 ± 0.0              | 20.6 ± 16.4                     | 3.1 ± 0.2 <sup>d</sup>                       |
| LV3                    | 4                    | 12.8 ± 2.9              | 6.9 ± 1.2                       | 1.7 ± 0.4                                    |
| LV4                    | 3                    | 21.0 ± 2.6              | 7.0 ± 2.2                       | 9.4 ± 0.6 <sup>d</sup>                       |
| LV5                    | 3                    | 20.3 ± 2.3              | 20.6 ± 19.0                     | 18.0 ± 1.1 <sup>d</sup>                      |
| LV6                    | 5                    | 21.4 ± 5.2              | 10.9 ± 8.9                      | 15.7 ± 1.0 <sup>d</sup>                      |
| LV7                    | 4                    | 20.3 ± 0.5              | 22.8 ± 20.6                     | 30.6 ± 3.2 <sup>d</sup>                      |
| LV8                    | 3                    | 20.3 ± 3.2              | 32.4 ± 2.3 <sup>d</sup>         | 17.1 ± 0.7 <sup>d</sup>                      |
| LV9                    | 5                    | 18.4 ± 1.3              | 14.7 ± 13.0                     | 17.2 ± 0.8 <sup>d</sup>                      |
| LV10                   | 3                    | 18.7 ± 1.2              | 30.7 ± 21.9                     | 15.3 ± 0.8 <sup>d</sup>                      |
| LV11                   | 3                    | 18.7 ± 2.3              | 28.4 ± 11.4 <sup>c</sup>        | 21.1 ± 2.1 <sup>d</sup>                      |
| LV12                   | 7                    | 13.3 ± 1.6 <sup>c</sup> | 28.2 ± 9.6 <sup>d</sup>         | 19.1 ± 0.3 <sup>d</sup>                      |

- a. QRsP-11 cells ( $1 \times 10^6$ ) were injected into mouse spleens. The mice were sacrificed when they appeared moribund. Tumour cells from liver metastases were cultured and used for sequential selection cycles.
- b. *Amigo2* mRNA levels are indicated as fold expression relative to QRsP-11 cells.
- c.  $p < 0.05$  versus QRsP-11 cells.
- d.  $p < 0.01$  versus QRsP-11 cells.



**Supplementary Table S2.**

***Classification of cell adhesion-related molecules upregulated or downregulated in LV12 cells compared with QRsP-11 cells***

| Upregulated gene                               |                          | Downregulated gene                                                                                 |                          |
|------------------------------------------------|--------------------------|----------------------------------------------------------------------------------------------------|--------------------------|
| Name                                           | Fold change <sup>a</sup> | Name                                                                                               | Fold change <sup>a</sup> |
| <b>Integrin-related gene</b>                   |                          |                                                                                                    |                          |
| Integrin beta-like 1 (Itgb1)                   | 16.5                     | Integrin, alpha E, epithelial-associated (Itgae)                                                   | 0.3                      |
| Integrin beta 7 (Itgb7)                        | 4.3                      |                                                                                                    |                          |
| <b>Immunoglobulin-related gene</b>             |                          |                                                                                                    |                          |
| Immunoglobulin superfamily, member 4A (Igsf4a) | 3.6                      | Activated leukocyte cell adhesion molecule (Alcam)                                                 | 0.1                      |
| Testicular cell adhesion molecule 1 (Tcam1)    | 2.9                      | Biregional cell adhesion molecule-related/down-regulated by oncogenes (Cdon) binding protein (Boc) | 0.4                      |
| Poliovirus receptor (Pvr)                      | 2.7                      | F11 receptor (F11r)                                                                                | 0.4                      |
| CD4 antigen (Cd4)                              | 2.3                      | Coxsackievirus and adenovirus receptor (Cxadr)                                                     | 0.4                      |
|                                                |                          | Neural cell adhesion molecule 1 (Ncam1)                                                            | 0.5                      |
|                                                |                          | Neighbor of Punc E11 (Nope)                                                                        | 0.5                      |
|                                                |                          | CD47 antigen (Cd47)                                                                                | 0.5                      |
| <b>Cadherin-related gene</b>                   |                          |                                                                                                    |                          |
| Protocadherin 9 (Pcdh9)                        | 4.4                      | Protocadherin beta 14 (Pcdhb14)                                                                    | 0.2                      |
|                                                |                          | FAT tumor suppressor homolog 1 (Drosophila) (Fat1)                                                 | 0.2                      |
|                                                |                          | Protocadherin beta 20 (Pcdhb20)                                                                    | 0.2                      |
|                                                |                          | Cadherin-like 26 (Cdh26)                                                                           | 0.4                      |
|                                                |                          | Protocadherin beta 17                                                                              | 0.4                      |

|  |  |                       |     |
|--|--|-----------------------|-----|
|  |  | (Pcdhb17)             |     |
|  |  | Protocadherin beta 22 | 0.5 |
|  |  | (Pcdhb22)             |     |

### Others

|                                                                                       |      |                                                                              |     |
|---------------------------------------------------------------------------------------|------|------------------------------------------------------------------------------|-----|
| Amphoterin-induced gene and open reading frame 2 (Amigo2)                             | 15.1 | Procollagen, type VI, alpha 1 (Col6a1)                                       | 0.1 |
| Wnt-1-inducible signalling pathway protein 1 (Wisp1)                                  | 7.4  | Palladin, cytoskeletal associated protein (Palld)                            | 0.1 |
| Nexilin (Nexn)                                                                        | 5.0  | Endothelial differentiation sphingolipid G-protein-coupled receptor 1 (Edg1) | 0.1 |
| Contactin associated protein-like 4 (Cntnap4)                                         | 3.3  | Neuropilin 1 (Nrp1)                                                          | 0.2 |
| Unknown                                                                               | 3.0  | Spondin 2, extracellular matrix protein (Spon2)                              | 0.2 |
| Procollagen, type VI, alpha 3 (Col6a3)                                                | 2.9  | Unknown                                                                      | 0.2 |
| Pinin (Pnn)                                                                           | 2.8  | Fibronectin 1 (Fn1)                                                          | 0.2 |
| Killer cell lectin-like receptor, subfamily A, member 18 (Klra18)                     | 2.7  | Plakophilin 2 (Pkp2)                                                         | 0.2 |
| Phosphatidylinositol 3-kinase, regulatory subunit, polypeptide 1 (p85 alpha) (Pik3r1) | 2.4  | Procollagen, type VI, alpha 2 (Col6a2)                                       | 0.3 |
| Transglutaminase 2, C polypeptide (Tgm2)                                              | 2.4  | Fibronectin leucine rich transmembrane protein 2 (Flrt2)                     | 0.3 |
| Thrombospondin 4 (Thbs4)                                                              | 2.3  | Rho family GTPase 3 (Rnd3)                                                   | 0.3 |
| Claudin 3 (Cldn3)                                                                     | 2.2  | B-cell leukemia/lymphoma 6 (Bcl6)                                            | 0.3 |
| Killer cell lectin-like receptor subfamily A, member 14 (Klra14)                      | 2.2  | Beta-1,4-N-acetyl-galactosaminyl transferase 2 (B4galnt2)                    | 0.3 |
| G protein-coupled receptor 98 (Gpr98)                                                 | 2.1  | Chemokine (C-X3-C motif) ligand 1 (Cx3cl1)                                   | 0.3 |
| Connective tissue growth factor (Ctgf)                                                | 2.0  | Embryonal Fyn-associated substrate (Efs)                                     | 0.4 |
| Kit ligand (Kitl)                                                                     | 2.0  | Elastin microfibril interfacier 2 (Emilin2)                                  | 0.4 |
|                                                                                       |      | von Willebrand factor A domain containing 1 (Vwal1)                          | 0.4 |

|                                                                             |     |
|-----------------------------------------------------------------------------|-----|
| Procollagen, type V, alpha 2<br>(Col5a2)                                    | 0.5 |
| LIM domain containing<br>preferred translocation<br>partner in lipoma (Lpp) | 0.5 |
| Scavenger receptor class F,<br>member 2 (Scarf2)                            | 0.5 |
| Nidogen 1 (Nid1)                                                            | 0.5 |
| Procollagen, type V, alpha 1<br>(Col5a1)                                    | 0.5 |
| Unknown                                                                     | 0.5 |
| Thrombospondin 1 (Thbs1)                                                    | 0.5 |

---

- a. Cell adhesion-related genes whose expression levels had changed more than 2-fold or less than 0.5-fold in LV12 cells compared with QRsP-11 cells are indicated.

### Supplementary Table S3.

#### *Primer sequences used in this study*

| Target         | Strand  | Sequence                    |
|----------------|---------|-----------------------------|
| Amigo1         | Forward | 5'-GAATGCCTTTGAGGACATGG-3'  |
|                | Reverse | 5'-CTTCAGCTTGTTGGAGGACAG-3' |
| Amigo2         | Forward | 5'-GAGGCGACCATAATGTCGTT-3'  |
|                | Reverse | 5'-CGGGCACCTTAGATAGGTTTT-3' |
| Amigo3         | Forward | 5'-CAGCCTCTCAGGATGGTAGC-3'  |
|                | Reverse | 5'-CAGGGTGGTAAAGCCTGTGT-3'  |
| Itgb11         | Forward | 5'-AGCAACCAGATGTGCAAGAA-3'  |
|                | Reverse | 5'-CCATGGCCTCCACATACTTC-3'  |
| Wisp1          | Forward | 5'-TTCTGCAAGTGGCCATAGGT-3'  |
|                | Reverse | 5'-ACTGGCCAGGGACTCTCAC-3'   |
| $\beta$ -actin | Forward | 5'-AGAGGGAAATCGTGCGTGAC-3'  |
|                | Reverse | 5'-CAATAGTGATGACCTGGCCGT-3' |
